# Supplementary material for: Metagenomic Sequencing Reveals the Taxonomic and Functional Characteristics of Rumen Micro-organisms in Gayals
Source: MDPI journal article supplement (doi:10.3390/microorganisms11051098), 2023-04-22
Supplement: s1 [file s1]

**Table S1.** Taxonomic distribution of phyla and genera of acetate metabolism and mean reads.

| item   | taxa                     | G(%±SD)    | Y(%±SD)    | p value |
|--------|--------------------------|------------|------------|---------|
| phyla  |                          |            |            |         |
| PTA    | Firmicutes               | 23.39±1.01 | 21.39±0.23 | 0.07    |
| PTA    | Bacteroidetes            | 16.67±3.59 | 24.23±1.35 | 0.03    |
| PTA    | Fibrobacteres            | 9.60±1.51  | 7.02±1.80  | 0.13    |
| PTA    | Spirochaetes             | 3.26±0.56  | 2.17±0.55  | 0.04    |
| PTA    | Acidobacteria            | 0.04±0.02  | 0.18±0.24  | 0.43    |
| PTA    | Actinobacteria           | 0.23±0.14  | 0.02±0.01  | 0.04    |
| PTA    | Deferribacteres          | 0.00±0.00  | 0.02±0.04  | 0.51    |
| PTA    | Proteobacteria           | 0.94±1.24  | 0.45±0.38  | 0.58    |
| PTA    | Tenericutes              | 0.06±0.11  | 0.00±0.00  | 0.51    |
| ACH    | Firmicutes               | 1.72±0.45  | 0.71±0.13  | 0.02    |
| ACH    | Atribacteria             | 1.12±0.74  | 0.60±0.41  | 0.35    |
| ACH    | Proteobacteria           | 0.19±0.04  | 0.17±0.10  | 0.68    |
| ACH    | Synergistetes            | 0.05±0.07  | 0.25±0.21  | 0.18    |
| FTHFS  | Firmicutes               | 25.31±2.02 | 19.92±2.92 | 0.06    |
| FTHFS  | norank                   | 5.95±1.88  | 8.01±0.73  | 0.15    |
| FTHFS  | Bacteroidetes            | 3.96±1.23  | 9.48±0.84  | 0.00    |
| FTHFS  | Spirochaetes             | 3.93±0.91  | 2.54±0.24  | 0.06    |
| FTHFS  | Actinobacteria           | 0.62±0.39  | 0.19±0.03  | 0.08    |
| FTHFS  | Planctomycetes           | 0.92±0.21  | 0.74±0.24  | 0.38    |
| FTHFS  | Proteobacteria           | 0.73±0.63  | 0.81±0.25  | 0.84    |
| FTHFS  | Thermodesulfobacteria    | 0.50±0.17  | 0.67±0.48  | 0.59    |
| FTHFS  | Synergistetes            | 0.33±0.38  | 0.11±0.05  | 0.41    |
| FTHFS  | Chloroflexi              | 0.24±0.04  | 0.29±0.06  | 0.37    |
| FTHFS  | Euryarchaeota            | 0.21±0.18  | 0.03±0.01  | 0.10    |
| FTHFS  | Tenericutes              | 0.03±0.05  | 0.00±0.00  | 0.51    |
| genera |                          |            |            |         |
| PTA    | <i>norank</i>            | 11.86±0.88 | 12.54±2.48 | 0.68    |
| PTA    | <i>Fibrobacter</i>       | 9.07±1.42  | 6.31±1.73  | 0.10    |
| PTA    | <i>Prevotella</i>        | 6.68±2.16  | 10.98±1.82 | 0.06    |
| PTA    | <i>Bacteroides</i>       | 5.34±1.48  | 7.70±1.89  | 0.16    |
| PTA    | <i>Treponema</i>         | 2.85±0.68  | 1.70±0.47  | 0.07    |
| PTA    | <i>Ruminococcus</i>      | 2.22±0.52  | 1.12±0.59  | 0.07    |
| PTA    | <i>Clostridium</i>       | 2.12±0.66  | 1.74±0.96  | 0.61    |
| PTA    | <i>Paludibacter</i>      | 1.25±0.52  | 0.81±0.86  | 0.49    |
| PTA    | <i>Butyrivibrio</i>      | 1.21±0.36  | 1.13±0.69  | 0.87    |
| PTA    | <i>Blautia</i>           | 0.90±0.08  | 0.63±0.23  | 0.13    |
| PTA    | <i>Tannerella</i>        | 0.76±0.83  | 0.40±0.32  | 0.53    |
| PTA    | <i>Roseburia</i>         | 0.67±0.60  | 0.08±0.09  | 0.23    |
| PTA    | <i>Pseudobutyrvibrio</i> | 0.65±0.20  | 0.86±0.54  | 0.56    |
| PTA    | <i>Eubacterium</i>       | 0.60±0.34  | 0.08±0.03  | 0.04    |
| PTA    | <i>Butyricimonas</i>     | 0.53±0.22  | 1.17±0.31  | 0.04    |
| PTA    | <i>Lachnoclostridium</i> | 0.51±0.35  | 0.28±0.17  | 0.37    |
| PTA    | <i>Chitinivibrio</i>     | 0.51±0.15  | 0.72±0.38  | 0.41    |
| PTA    | <i>Spirochaeta</i>       | 0.36±0.19  | 0.29±0.02  | 0.78    |
| PTA    | <i>Porphyromonas</i>     | 0.33±0.15  | 0.00±0.00  | 0.07    |
| PTA    | <i>Dysgonomonas</i>      | 0.31±0.17  | 0.62±0.34  | 0.23    |
| PTA    | <i>Prolixibacter</i>     | 0.22±0.11  | 0.30±0.16  | 0.53    |
| PTA    | <i>Barnesiella</i>       | 0.18±0.13  | 0.39±0.28  | 0.32    |

|       |                              |            |            |      |
|-------|------------------------------|------------|------------|------|
| PTA   | <i>Flavonifractor</i>        | 0.16±0.09  | 0.20±0.13  | 0.67 |
| PTA   | <i>Caldanaerobius</i>        | 0.12±0.04  | 0.13±0.11  | 0.98 |
| PTA   | <i>Acetobacter</i>           | 0.12±0.14  | 0.00±0.00  | 0.20 |
| PTA   | <i>Rikenella</i>             | 0.12±0.11  | 0.11±0.07  | 0.89 |
| PTA   | <i>Azospirillum</i>          | 0.10±0.17  | 0.00±0.00  | 0.51 |
| PTA   | <i>Oribacterium</i>          | 0.10±0.02  | 0.03±0.03  | 0.04 |
| PTA   | <i>Syntrophothermus</i>      | 0.06±0.08  | 0.15±0.25  | 0.67 |
| PTA   | <i>Alistipes</i>             | 0.05±0.07  | 0.79±1.12  | 0.29 |
| PTA   | <i>Holophaga</i>             | 0.04±0.02  | 0.18±0.24  | 0.70 |
| PTA   | <i>Odoribacter</i>           | 0.02±0.03  | 0.27±0.42  | 0.22 |
| PTA   | <i>Caldicellulosiruptor</i>  | 0.01±0.01  | 0.14±0.14  | 0.12 |
| ACH   | <i>Clostridium</i>           | 0.24±0.42  | 0.00±0.00  | 0.51 |
| ACH   | <i>Eubacterium</i>           | 0.23±0.04  | 0.22±0.11  | 0.94 |
| ACH   | <i>Clostridiisalibacter</i>  | 0.11±0.06  | 0.01±0.01  | 0.08 |
| ACH   | <i>Flavonifractor</i>        | 0.10±0.07  | 0.01       | 0.05 |
| ACH   | <i>Ochrobactrum</i>          | 0.04±0.03  | 0.12±0.09  | 0.19 |
| ACH   | <i>Pyramidobacter</i>        | 0.00±0.00  | 0.13±0.14  | 0.20 |
| FTHFS | <i>norank</i>                | 13.82±2.00 | 14.74±0.47 | 0.48 |
| FTHFS | <i>Treponema</i>             | 3.93±0.90  | 2.52±0.26  | 0.06 |
| FTHFS | <i>Ruminococcus</i>          | 3.53±1.93  | 1.90±0.57  | 0.23 |
| FTHFS | <i>Clostridium</i>           | 3.26±1.40  | 2.50±1.44  | 0.55 |
| FTHFS | <i>Butyrivibrio</i>          | 2.89±0.90  | 2.63±1.02  | 0.75 |
| FTHFS | <i>Prevotella</i>            | 2.66±1.44  | 6.80±1.12  | 0.02 |
| FTHFS | <i>Oscillibacter</i>         | 1.60±0.43  | 0.86±0.46  | 0.11 |
| FTHFS | <i>Eubacterium</i>           | 1.23±0.45  | 0.99±0.58  | 0.59 |
| FTHFS | <i>Candidatus Kuenenia</i>   | 0.92±0.21  | 0.70±0.23  | 0.28 |
| FTHFS | <i>Bacteroides</i>           | 0.79±0.42  | 2.28±0.97  | 0.07 |
| FTHFS | <i>Pseudobutyrvibrio</i>     | 0.56±0.22  | 1.19±0.70  | 0.21 |
| FTHFS | <i>Thermodesulfator</i>      | 0.50±0.17  | 0.67±0.48  | 0.59 |
| FTHFS | <i>Pseudoflavonifractor</i>  | 0.41±0.37  | 0.02±0.02  | 0.07 |
| FTHFS | <i>Lachnoclostridium</i>     | 0.41±0.49  | 0.30±0.22  | 0.75 |
| FTHFS | <i>Desulfomonile</i>         | 0.29±0.17  | 0.68±0.31  | 0.13 |
| FTHFS | <i>Blautia</i>               | 0.28±0.37  | 0.04±0.07  | 0.22 |
| FTHFS | <i>Atopobium</i>             | 0.25±0.22  | 0.01±0.01  | 0.35 |
| FTHFS | <i>Dehalococcoides</i>       | 0.24±0.04  | 0.29±0.06  | 0.37 |
| FTHFS | <i>Paraprevotella</i>        | 0.19±0.21  | 0.32±0.26  | 0.53 |
| FTHFS | <i>Dorea</i>                 | 0.16±0.20  | 0.01±0.00  | 0.35 |
| FTHFS | <i>Thermosediminibacter</i>  | 0.16±0.15  | 0.03±0.04  | 0.14 |
| FTHFS | <i>Cloacibacillus</i>        | 0.15±0.15  | 0.11±0.05  | 0.65 |
| FTHFS | <i>Lachnobacterium</i>       | 0.15±0.25  | 0.00±0.00  | 0.20 |
| FTHFS | <i>Bacillus</i>              | 0.14±0.18  | 0.01±0.01  | 0.11 |
| FTHFS | <i>Selenomonas</i>           | 0.14±0.14  | 0.20±0.14  | 0.91 |
| FTHFS | <i>Coprobacillus</i>         | 0.13±0.05  | 0.24±0.10  | 0.18 |
| FTHFS | <i>Phascolarctobacterium</i> | 0.13±0.05  | 0.67±0.18  | 0.01 |
| FTHFS | <i>Azospirillum</i>          | 0.13±0.22  | 0.00±0.00  | 0.51 |

**Table S2.** Taxonomic distribution of phyla and genera of butyric acid metabolism and mean reads.

| item   | taxa                        | G(%±SD)    | Y(%±SD)    | p value |
|--------|-----------------------------|------------|------------|---------|
| phyla  |                             |            |            |         |
| BHBD   | Firmicutes                  | 14.2±1.37  | 13.45±2.08 | 0.63    |
| BHBD   | Bacteroidetes               | 3.73±0.26  | 5.28±1.24  | 0.10    |
| BHBD   | Chloroflexi                 | 0.13±0.13  | 0.31±0.23  | 0.31    |
| BHBD   | Euryarchaeota               | 0.19±0.29  | 0.06±0.04  | 1.00    |
| THL    | Firmicutes                  | 1.22±1.05  | 0.38±0.37  | 0.26    |
| PTB    | Bacteroidetes               | 14.8±3.38  | 20.41±0.87 | 0.17    |
| PTB    | Firmicutes                  | 12.51±5.97 | 6.32±1.37  | 0.09    |
| PTB    | norank                      | 0.55±0.17  | 0.54±0.17  | 0.97    |
| PTB    | Cloacimonetes               | 0.32±0.45  | 0.31±0.23  | 0.97    |
| PTB    | Acidobacteria               | 0.31±0.24  | 0.16±0.17  | 0.45    |
| PTB    | Elusimicrobia               | 0.12±0.21  | 0.14±0.24  | 1.00    |
| BK     | Firmicutes                  | 28.44±1.91 | 28.26±5.49 | 0.96    |
| BK     | Bacteroidetes               | 17.19±3.85 | 17.76±3.14 | 0.85    |
| BK     | Actinobacteria              | 0.56±0.52  | 0.08±0.09  | 0.19    |
| BK     | Elusimicrobia               | 0.01±0.02  | 0.13±0.23  | 1.00    |
| BCACT  | Bacteroidetes               | 3.78±0.38  | 4.94±1.51  | 0.26    |
| BCACT  | Firmicutes                  | 1.28±0.25  | 1.00±0.41  | 0.38    |
| BCACT  | Fusobacteria                | 0.46±0.11  | 0.25±0.03  | 1.00    |
| BCACT  | Synergistetes               | 0.00±0.00  | 0.10±0.11  | 0.20    |
| genera |                             |            |            |         |
| BHBD   | <i>Alistipes</i>            | 3.72±0.23  | 5.28±1.23  | 0.10    |
| BHBD   | norank                      | 3.00±0.43  | 3.50±1.05  | 0.49    |
| BHBD   | <i>Butyrivibrio</i>         | 2.69±0.62  | 2.47±1.36  | 0.81    |
| BHBD   | <i>Ruminococcus</i>         | 1.50±1.02  | 0.79±0.53  | 0.35    |
| BHBD   | <i>Oscillibacter</i>        | 1.08±0.26  | 0.94±0.26  | 0.55    |
| BHBD   | <i>Clostridium</i>          | 0.99±0.44  | 0.70±0.13  | 0.34    |
| BHBD   | <i>Pseudobutyrvibrio</i>    | 0.85±0.40  | 0.50±0.19  | 0.24    |
| BHBD   | <i>Clostridiisalibacter</i> | 0.46±0.16  | 0.52±0.06  | 0.62    |
| BHBD   | <i>Eubacterium</i>          | 0.43±0.12  | 0.69±0.08  | 0.04    |
| BHBD   | <i>Flavonifractor</i>       | 0.33±0.22  | 0.60±0.23  | 0.21    |
| BHBD   | <i>Coprobacillus</i>        | 0.20±0.19  | 0.21±0.12  | 0.93    |
| BHBD   | <i>Methanobrevibacter</i>   | 0.19±0.29  | 0.04±0.05  | 0.52    |
| BHBD   | <i>Roseburia</i>            | 0.14±0.15  | 0.30±0.17  | 0.29    |
| BHBD   | <i>Faecalibacterium</i>     | 0.13±0.12  | 0.00±0.00  | 0.20    |
| BHBD   | <i>Caldanaerobacter</i>     | 0.06±0.07  | 0.13±0.18  | 0.58    |
| BHBD   | <i>Desulfitobacterium</i>   | 0.01±0.01  | 0.14±0.22  | 0.36    |
| THL    | <i>Desulfitobacterium</i>   | 0.67±0.91  | 0.20±0.12  | 0.19    |
| THL    | <i>Oscillibacter</i>        | 0.20±0.23  | 0.02±0.02  | 0.59    |
| THL    | <i>Clostridium</i>          | 0.10±0.08  | 0.01±0.00  | 0.08    |
| THL    | <i>Acetobacterium</i>       | 0.08±0.06  | 0.03±0.05  | 0.30    |
| THL    | <i>Coproccoccus</i>         | 0.04±0.04  | 0.05±0.08  | 0.99    |
| PTB    | norank                      | 9.15±3.29  | 7.17±1.93  | 0.42    |
| PTB    | <i>Alistipes</i>            | 4.40±0.96  | 4.75±1.03  | 0.69    |
| PTB    | <i>Prevotella</i>           | 3.98±1.59  | 7.91±2.26  | 0.07    |
| PTB    | <i>Bacteroides</i>          | 2.69±1.15  | 3.58±0.27  | 0.26    |
| PTB    | <i>Butyrivibrio</i>         | 2.49±0.76  | 1.48±0.68  | 0.16    |
| PTB    | <i>Clostridium</i>          | 1.95±0.78  | 0.42±0.18  | 0.03    |
| PTB    | <i>Lachnoclostridium</i>    | 0.74±0.57  | 0.23±0.24  | 0.23    |

|       |                               |            |            |      |
|-------|-------------------------------|------------|------------|------|
| PTB   | <i>Butyricimonas</i>          | 0.55±0.20  | 0.66±0.96  | 0.85 |
| PTB   | <i>Geothrix</i>               | 0.31±0.25  | 0.16±0.17  | 0.45 |
| PTB   | <i>Candidatus Cloacimonas</i> | 0.29±0.47  | 0.19±0.17  | 0.97 |
| PTB   | <i>Coprococcus</i>            | 0.19±0.14  | 0.03±0.03  | 0.09 |
| PTB   | <i>Prolixibacter</i>          | 0.17±0.19  | 0.28±0.21  | 0.55 |
| PTB   | <i>Roseburia</i>              | 0.16±0.07  | 0.13±0.09  | 0.35 |
| PTB   | <i>Odoribacter</i>            | 0.16±0.27  | 0.01±0.00  | 0.61 |
| PTB   | <i>Proteiniphilum</i>         | 0.14±0.14  | 0.15±0.2   | 0.98 |
| PTB   | <i>Elusimicrobium</i>         | 0.12±0.21  | 0.14±0.24  | 1.00 |
| PTB   | <i>Alloprevotella</i>         | 0.08±0.02  | 0.39±0.38  | 0.24 |
| BK    | <i>norank</i>                 | 13.85±1.97 | 15.60±2.88 | 0.43 |
| BK    | <i>Bacteroides</i>            | 6.83±2.59  | 4.72±0.69  | 0.23 |
| BK    | <i>Prevotella</i>             | 4.53±1.74  | 7.97±3.52  | 0.20 |
| BK    | <i>Clostridium</i>            | 4.03±0.58  | 4.33±4.30  | 0.91 |
| BK    | <i>Butyrivibrio</i>           | 3.22±1.29  | 2.41±1.06  | 0.45 |
| BK    | <i>Odoribacter</i>            | 2.31±2.09  | 1.00±0.59  | 0.33 |
| BK    | <i>Alistipes</i>              | 2.08±0.44  | 2.11±1.09  | 0.96 |
| BK    | <i>Blautia</i>                | 1.68±1.64  | 0.54±0.22  | 0.20 |
| BK    | <i>Mogibacterium</i>          | 1.60±0.23  | 0.80±0.94  | 0.27 |
| BK    | <i>Butyricimonas</i>          | 0.84±0.61  | 0.89±0.23  | 0.91 |
| BK    | <i>Pseudobutyrovibrio</i>     | 0.83±0.40  | 1.07±1.11  | 0.74 |
| BK    | <i>Caloramator</i>            | 0.77±0.43  | 1.69±0.23  | 0.03 |
| BK    | <i>Alloprevotella</i>         | 0.35±0.04  | 0.23±0.12  | 0.17 |
| BK    | <i>Eggerthella</i>            | 0.35±0.30  | 0.01±0.00  | 0.35 |
| BK    | <i>Alkaliphilus</i>           | 0.23±0.31  | 0.22±0.26  | 0.98 |
| BK    | <i>Eubacterium</i>            | 0.21±0.08  | 0.18±0.28  | 0.87 |
| BK    | <i>Flavonifractor</i>         | 0.16±0.28  | 0.00±0.00  | 0.51 |
| BK    | <i>Roseburia</i>              | 0.16±0.11  | 0.25±0.22  | 0.55 |
| BK    | <i>Olsenella</i>              | 0.15±0.15  | 0.07±0.09  | 0.49 |
| BK    | <i>Lachnoclostridium</i>      | 0.11±0.05  | 0.05±0.06  | 0.25 |
| BK    | <i>Elusimicrobium</i>         | 0.01±0.02  | 0.13±0.23  | 1.00 |
| BK    | <i>Proteiniphilum</i>         | 0.01±0.01  | 0.48±0.83  | 1.00 |
| BCACT | <i>Alistipes</i>              | 2.83±0.53  | 2.59±1.36  | 0.79 |
| BCACT | <i>Odoribacter</i>            | 0.78±0.60  | 0.74±0.32  | 0.93 |
| BCACT | <i>norank</i>                 | 0.67±0.18  | 0.50±0.48  | 0.61 |
| BCACT | <i>Photobacterium</i>         | 0.30±0.27  | 0.13±0.13  | 0.37 |
| BCACT | <i>Clostridium</i>            | 0.25±0.06  | 0.15±0.17  | 0.37 |
| BCACT | <i>Butyricimonas</i>          | 0.12±0.08  | 1.50±1.45  | 0.07 |
| BCACT | <i>Blautia</i>                | 0.10±0.06  | 0.00±0.00  | 0.04 |
